# Supplementary material for: AXL phosphorylates and up-regulates TNS2 and its implications in IRS-1-associated metabolism in cancer cells
Source: PubMed Central journal article supplement (PMC6233515; doi:10.1186/s12929-018-0465-x), 2018-11-12

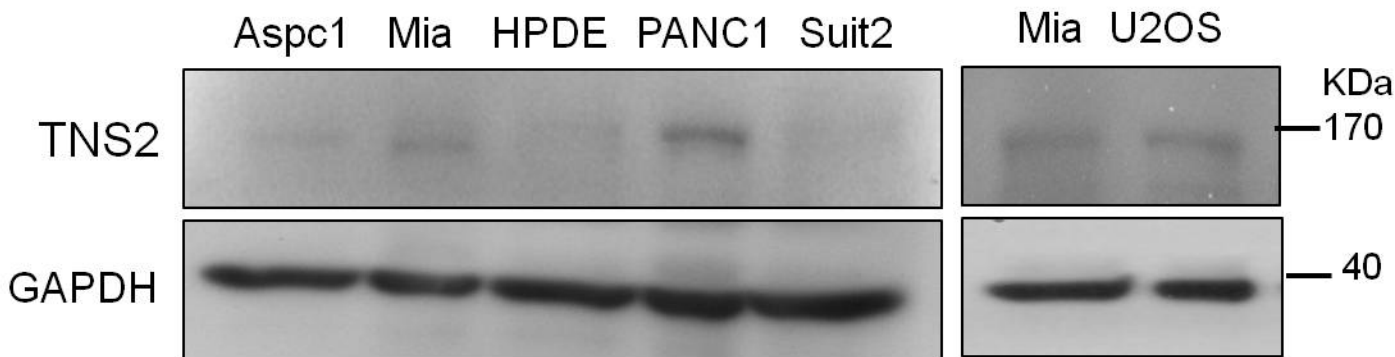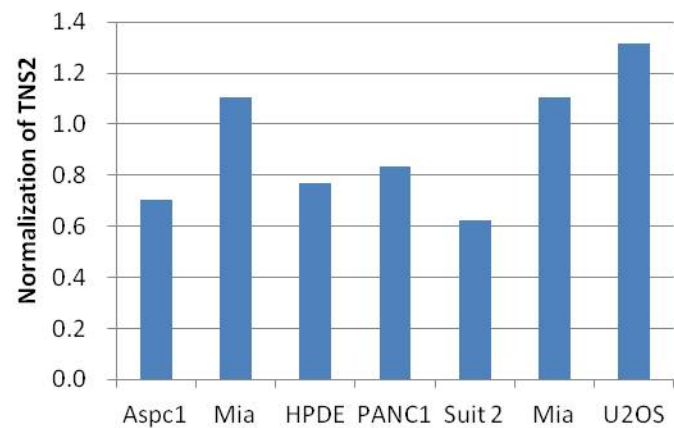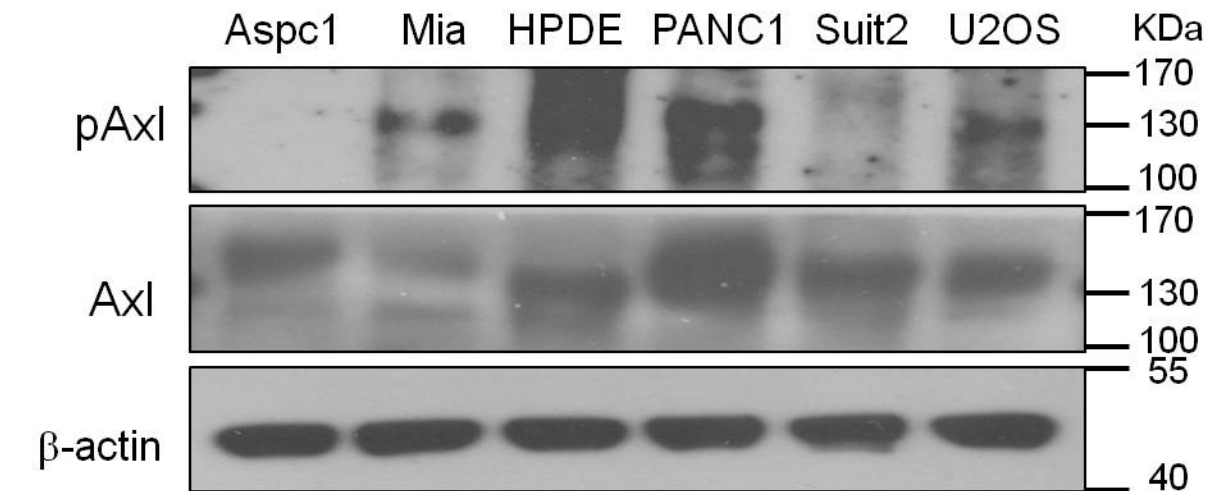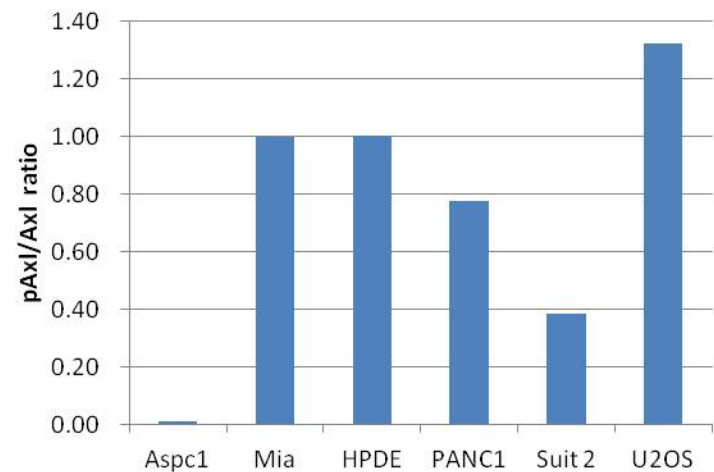

Supplement: 12929_2018_465_MOESM1_ESM.pdf [file 12929_2018_465_MOESM1_ESM.pdf]
