# Supplementary material for: AXL phosphorylates and up-regulates TNS2 and its implications in IRS-1-associated metabolism in cancer cells
Source: PubMed Central journal article supplement (PMC6233515; doi:10.1186/s12929-018-0465-x), 2018-11-12
Supplement: 12929_2018_465_MOESM2_ESM.pdf [file 12929_2018_465_MOESM2_ESM.pdf]

Additional file 2

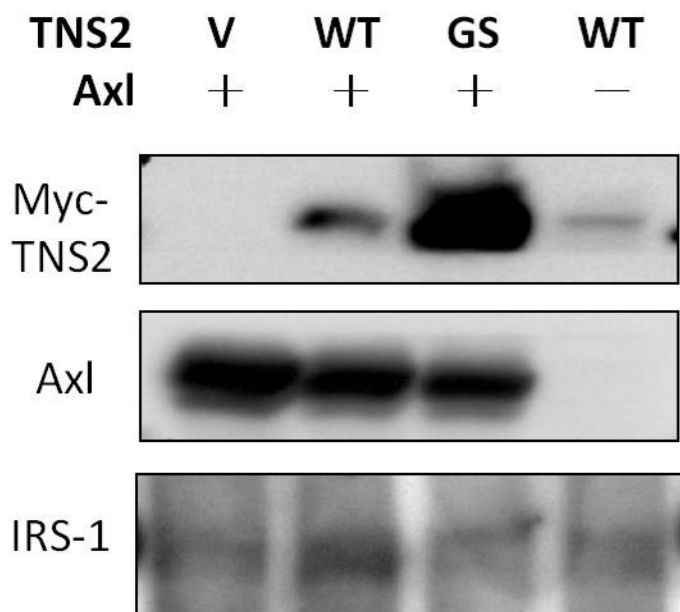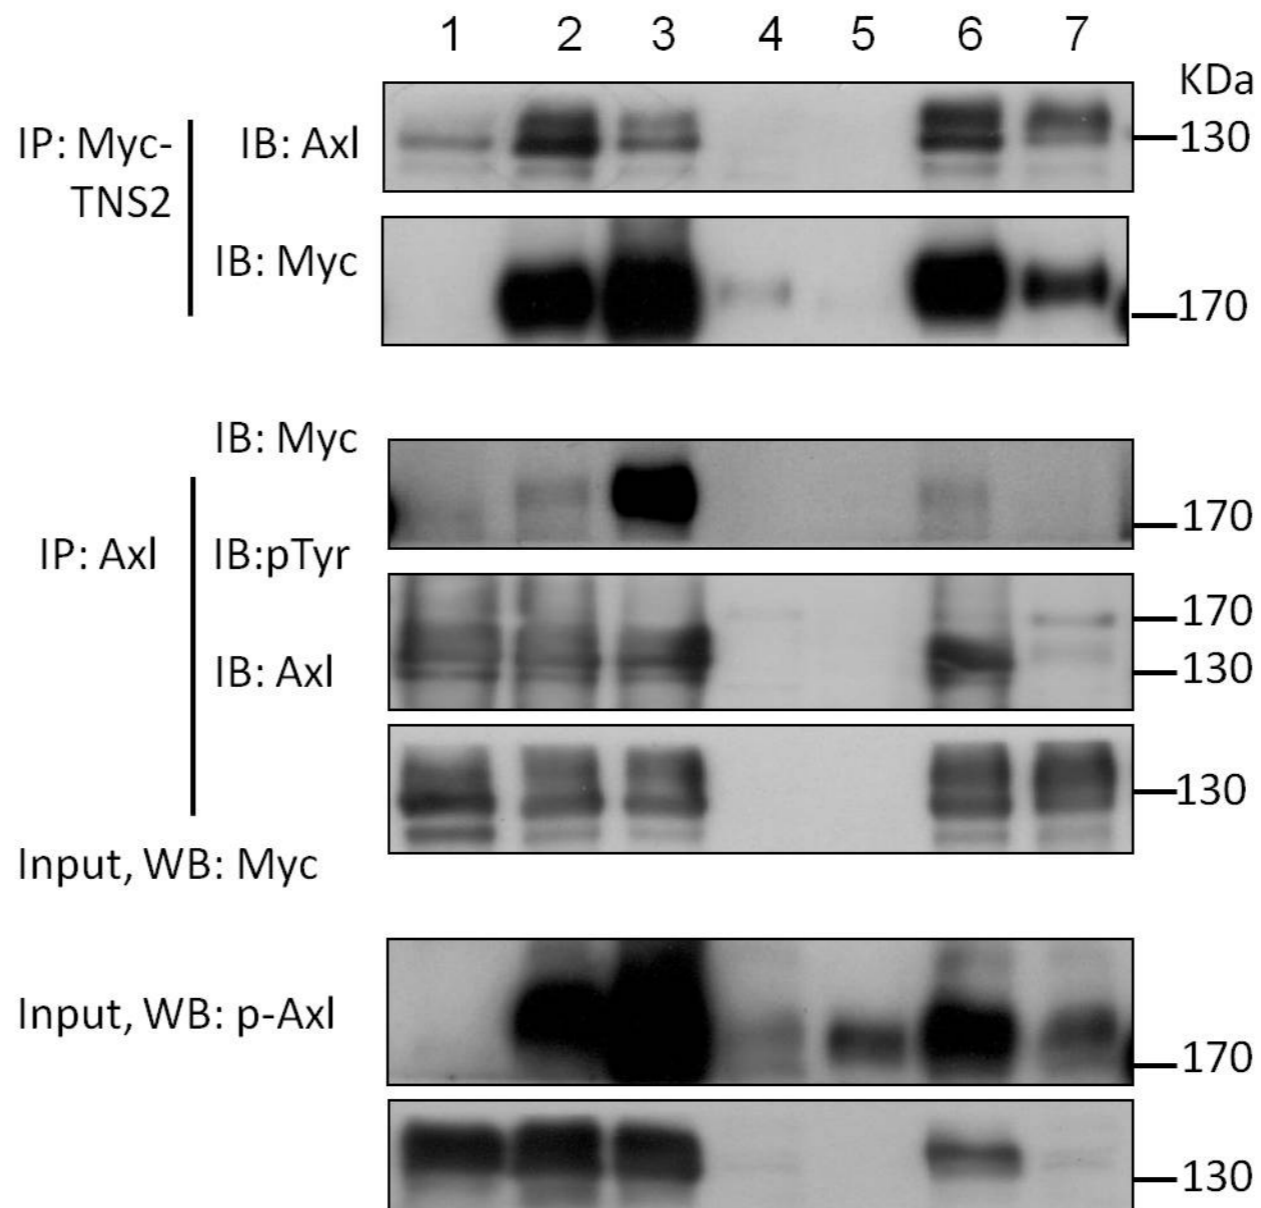

1. Vector +Axl
2. Wt TNS2+Axl
3. TNS2 (GS)+Axl
4. Wt TNS2+Axl  $\Delta$ ICD
5. Wt TNS2+Axl  $\Delta$ ECD
6. Wt TNS2+886/821mut-Axl
7. Wt TNS2+KD-Axl
