# Supplementary material for: AXL phosphorylates and up-regulates TNS2 and its implications in IRS-1-associated metabolism in cancer cells
Source: PubMed Central journal article supplement (PMC6233515; doi:10.1186/s12929-018-0465-x), 2018-11-12
Supplement: 12929_2018_465_MOESM3_ESM.pdf [file 12929_2018_465_MOESM3_ESM.pdf]

**Additional file 3.** Clinicopathological characteristics of the 33 pancreatic adenocarcinoma patients. Data were shown as mean  $\pm$  SD of H-score.

|       | Early stage      | Late stage       |
|-------|------------------|------------------|
|       | n=17             | n=16             |
|       | mean $\pm$ SD    | mean $\pm$ SD    |
| Axl   | 125.1 $\pm$ 30.4 | 134.2 $\pm$ 27.0 |
| pAxl  | 93.1 $\pm$ 59.2  | 109.9 $\pm$ 67.9 |
| pTNS2 | 151.3 $\pm$ 48.9 | 140.5 $\pm$ 52.2 |
| TNS2  | 199.2 $\pm$ 27.6 | 200.2 $\pm$ 24.8 |
| Glut4 | 157.6 $\pm$ 45.5 | 165.3 $\pm$ 35.2 |
| IRS1  | 129.2 $\pm$ 45.4 | 129.0 $\pm$ 25.7 |

Early stage: stage IIa and earlier; Late stage: stage IIb and later stages
