# Supplementary material for: AXL phosphorylates and up-regulates TNS2 and its implications in IRS-1-associated metabolism in cancer cells
Source: PubMed Central journal article supplement (PMC6233515; doi:10.1186/s12929-018-0465-x), 2018-11-12
Supplement: 12929_2018_465_MOESM4_ESM.pdf [file 12929_2018_465_MOESM4_ESM.pdf]

Left--Tumor

Right--Adjacent normal

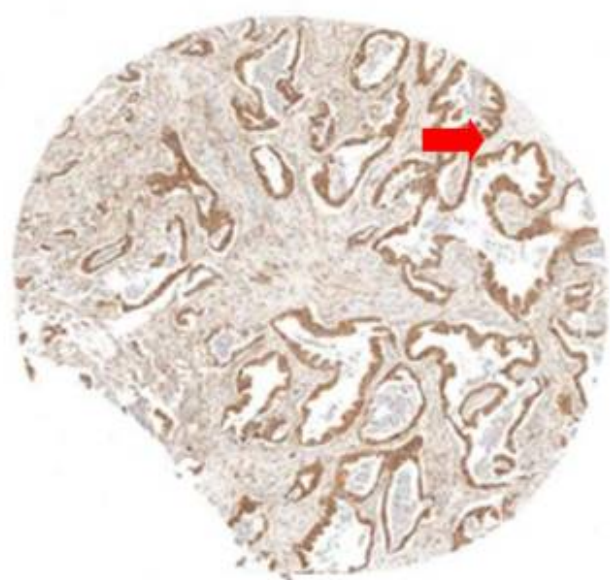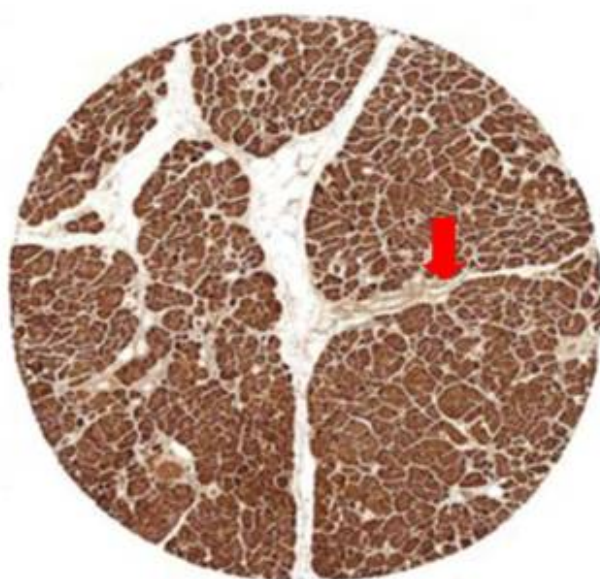

TNS2

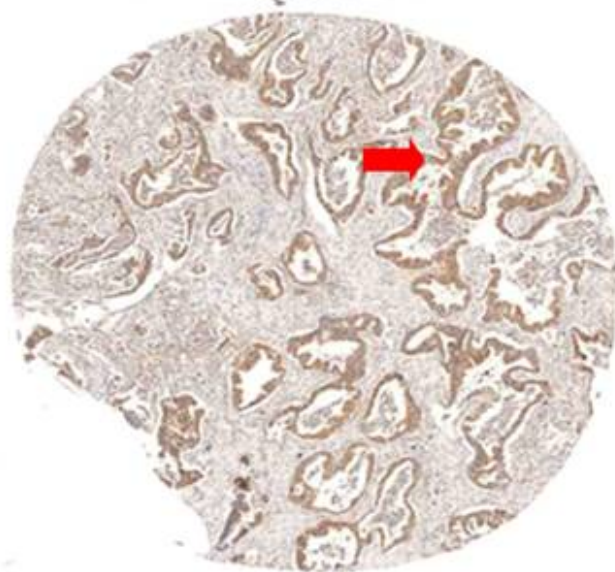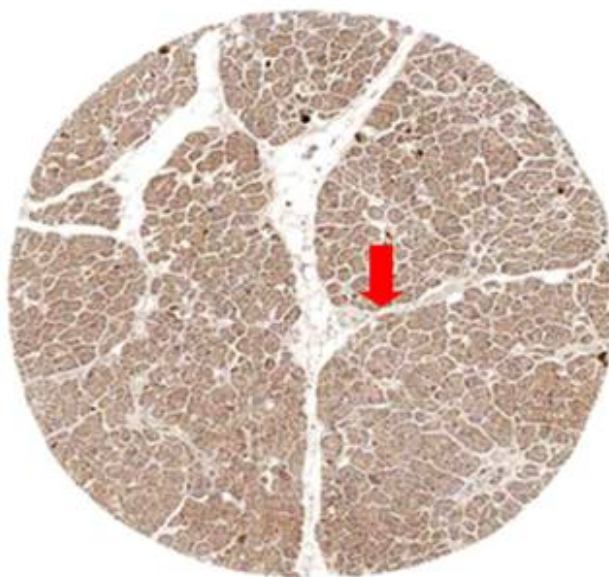

Axl

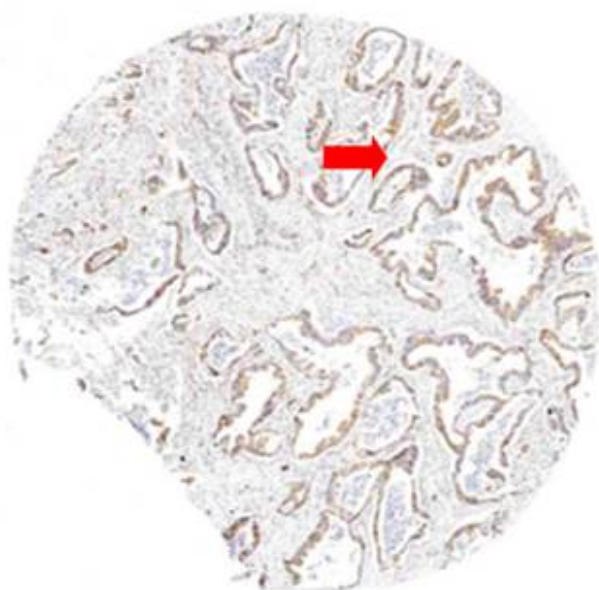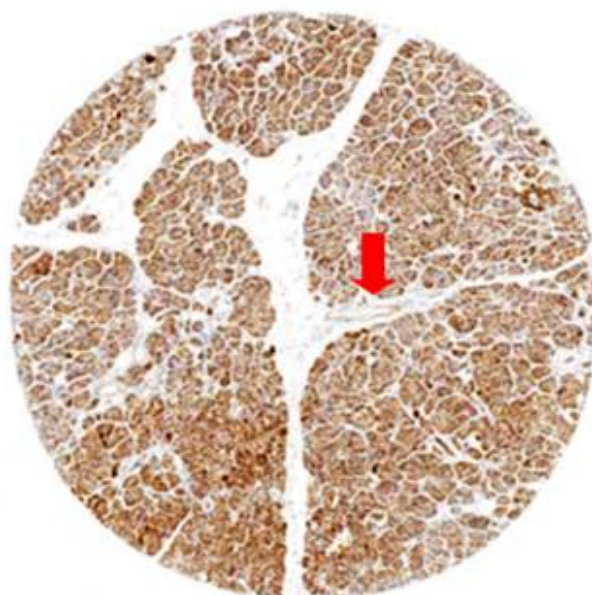

IRS-1

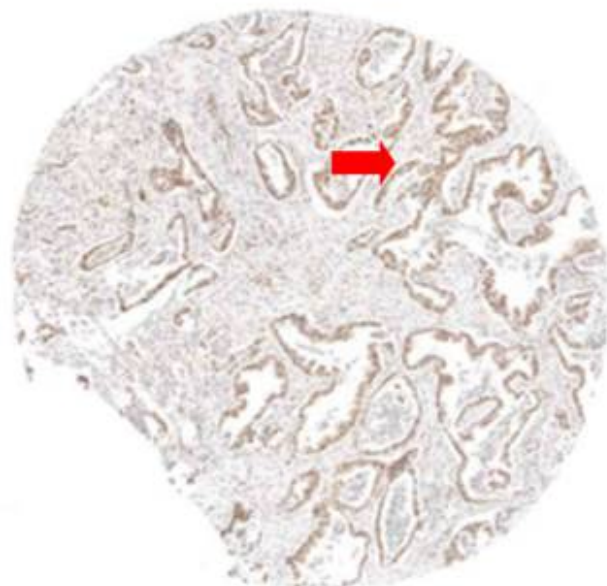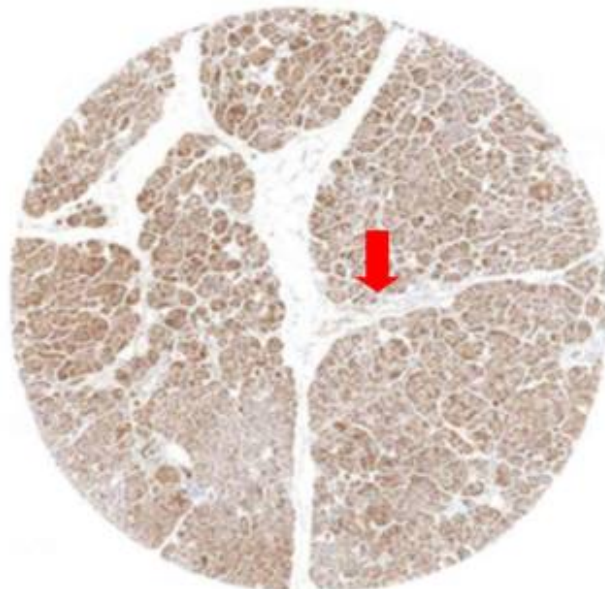

Glut4
