# Supplementary material for: AXL phosphorylates and up-regulates TNS2 and its implications in IRS-1-associated metabolism in cancer cells
Source: PubMed Central journal article supplement (PMC6233515; doi:10.1186/s12929-018-0465-x), 2018-11-12
Supplement: 12929_2018_465_MOESM5_ESM.pdf [file 12929_2018_465_MOESM5_ESM.pdf]

# Additional file 5

| Analysis Type by Cancer     | Cancer vs. Normal |    | Cancer vs. Cancer |    |              |    | Clinical Outcome |  | Outlier |     |
|-----------------------------|-------------------|----|-------------------|----|--------------|----|------------------|--|---------|-----|
|                             |                   |    | Cancer Histology  |    | Multi-cancer |    |                  |  |         |     |
| Bladder Cancer              |                   | 4  |                   |    |              | 2  |                  |  | 7       | 7   |
| Brain and CNS Cancer        |                   | 3  | 1                 |    | 1            |    |                  |  | 32      | 32  |
| Breast Cancer               | 2                 | 14 | 2                 | 5  | 1            |    |                  |  | 61      | 61  |
| Cervical Cancer             |                   | 1  |                   |    |              | 1  |                  |  | 8       | 8   |
| Colorectal Cancer           | 1                 | 13 |                   |    |              | 1  |                  |  | 31      | 31  |
| Esophageal Cancer           | 2                 | 3  |                   |    |              | 1  |                  |  | 10      | 10  |
| Gastric Cancer              |                   | 1  | 1                 | 3  |              | 2  |                  |  | 15      | 15  |
| Head and Neck Cancer        |                   | 5  |                   |    | 1            |    |                  |  | 22      | 22  |
| Kidney Cancer               | 1                 | 4  | 3                 | 5  | 2            |    |                  |  | 17      | 17  |
| Leukemia                    |                   |    | 1                 |    |              | 6  |                  |  | 48      | 48  |
| Liver Cancer                |                   | 2  | 2                 | 2  |              |    |                  |  | 12      | 12  |
| Lung Cancer                 | 1                 | 12 | 3                 | 4  |              |    |                  |  | 34      | 34  |
| Lymphoma                    | 5                 |    |                   |    |              | 8  |                  |  | 29      | 29  |
| Melanoma                    |                   |    |                   |    | 4            | 1  |                  |  | 20      | 20  |
| Myeloma                     |                   | 1  |                   |    |              | 1  |                  |  | 15      | 15  |
| Other Cancer                | 2                 |    |                   |    | 1            |    |                  |  | 35      | 35  |
| Ovarian Cancer              | 1                 | 3  |                   |    |              | 1  |                  |  | 15      | 15  |
| Pancreatic Cancer           |                   |    |                   |    |              |    |                  |  | 13      | 13  |
| Prostate Cancer             |                   |    |                   |    |              |    |                  |  | 25      | 25  |
| Sarcoma                     |                   | 6  | 4                 | 4  | 4            |    |                  |  | 23      | 23  |
| Significant Unique Analyses | 15                | 72 | 17                | 23 | 11           | 21 |                  |  | 438     | 438 |
| Total Unique Analyses       | 415               |    | 686               |    | 252          |    |                  |  | 876     |     |

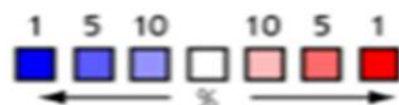

Cell color is determined by the best gene rank percentile for the analyses within the cell.
